# Supplementary material for: Rational design of stable carbon nitride monolayer membranes for highly controllable CO2 capture and separation from CH4 and C2H2
Source: Royal Society of Chemistry journal article supplement (doi:10.1039/d4nr04590d), 2024-12-18
Supplement: d4nr04590d1.pdf [file d4nr04590d1.pdf]

## Supplemental Information

for

### **Rational design of stable carbon nitride monolayer membranes for highly controllable CO<sub>2</sub> capture and separation from CH<sub>4</sub> and C<sub>2</sub>H<sub>2</sub>**

Yongliang Yong,<sup>a,b\*</sup> Zhuo Cheng,<sup>a</sup> Wentao Guo,<sup>a</sup> Qihua Hou,<sup>a</sup> Zhiyong Liu,<sup>a</sup> Shaobo Huang,<sup>a</sup> Xinli Li,<sup>b,c</sup> and Yongpeng Ren<sup>b,c</sup>

<sup>a</sup> *School of Physics and Engineering, Henan University of Science and Technology, Luoyang 471023, China*

<sup>b</sup> *Advanced Materials Science Innovation Center, Longmen Laboratory, Luoyang 471003, China*

<sup>c</sup> *School of Materials Science and Engineering, Henan University of Science and Technology, Luoyang 471023, China*

---

\*Corresponding Author. Electronic mail: [ylyong@haust.edu.cn](mailto:ylyong@haust.edu.cn).

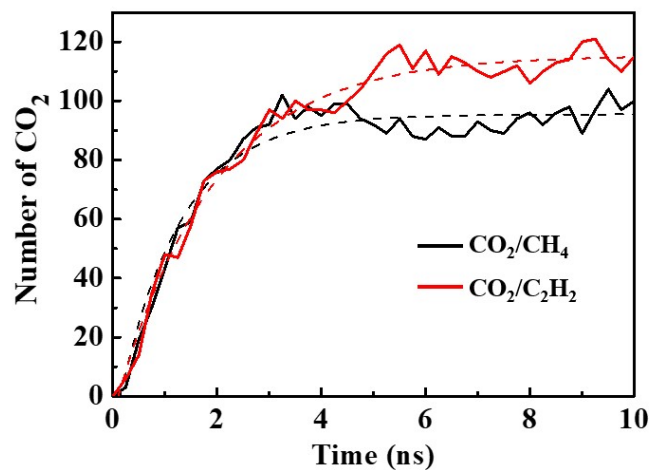

**Fig. S1.** The number of permeated CO<sub>2</sub> molecules versus the simulation time in the separation of CO<sub>2</sub>/CH<sub>4</sub> and CO<sub>2</sub>/C<sub>2</sub>H<sub>2</sub> at 300 K. The corresponding dotted lines are the fitted lines.

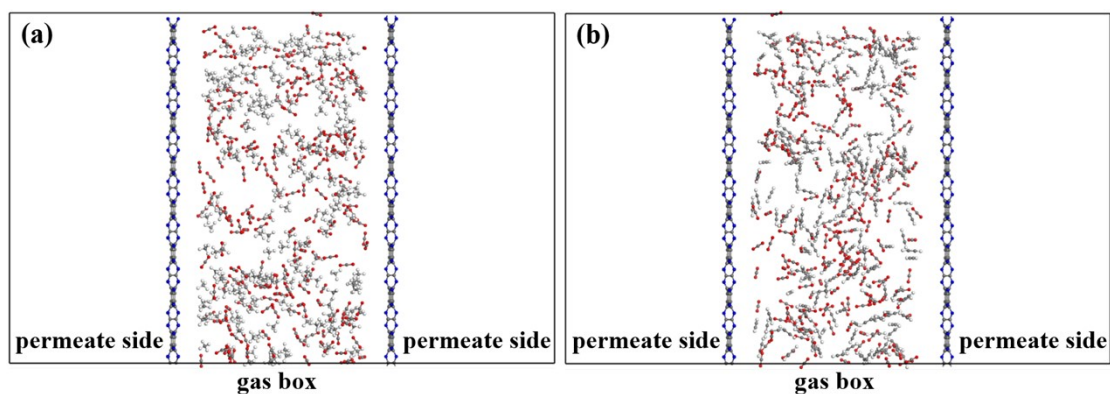

**Figure S2.** The initial models of (a) CO<sub>2</sub>/CH<sub>4</sub> and (b) CO<sub>2</sub>/C<sub>2</sub>H<sub>2</sub> mixtures through the g-C<sub>12</sub>N<sub>8</sub> membrane.

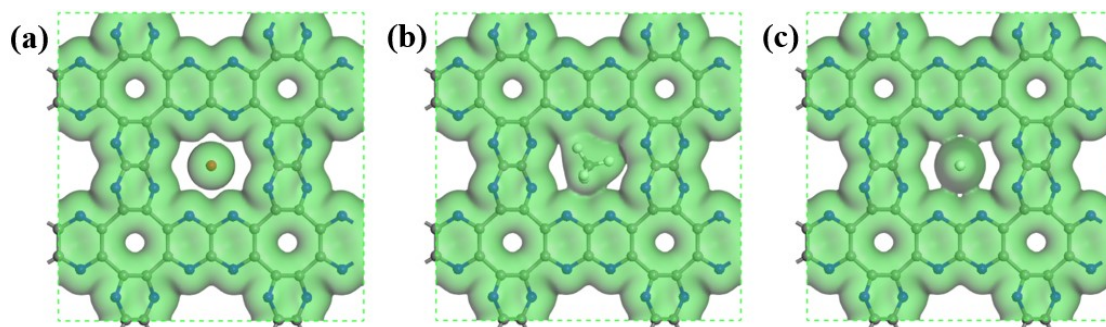

**Figure S3.** Electron density isosurfaces for (a) CO<sub>2</sub>, (b) CH<sub>4</sub>, and (c) C<sub>2</sub>H<sub>2</sub> molecules permeating through the C<sub>12</sub>N<sub>8</sub> monolayer (isovalue of 0.08 e<sup>-</sup>Å<sup>-3</sup>).

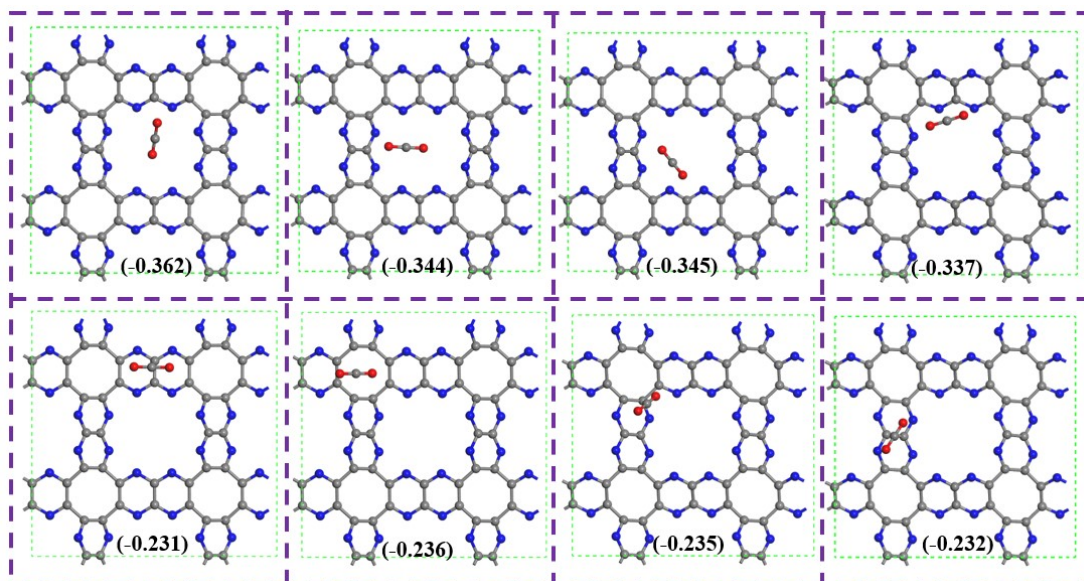

**Figure S4.** The stable adsorption sites for CO<sub>2</sub> on the g-C<sub>12</sub>N<sub>8</sub> membrane. The values in parentheses are the corresponding adsorption energy (in eV).

**Table S1** Atomic coordinates for the unit cell of the g-C<sub>12</sub>N<sub>8</sub> monolayer.

| Lattice Parameters<br>(Å, °)         | Atom | Coordinates (fractional) |          |          |
|--------------------------------------|------|--------------------------|----------|----------|
|                                      |      | <i>x</i>                 | <i>y</i> | <i>z</i> |
| a=8.01<br>b=8.01<br>c=25<br>α=β=γ=90 | N    | 0.1429                   | 0.6736   | 0.5057   |
|                                      | N    | 0.8571                   | 0.3264   | 0.4943   |
|                                      | N    | 0.8571                   | 0.6736   | 0.4943   |
|                                      | N    | 0.1429                   | 0.3264   | 0.5057   |
|                                      | N    | 0.3742                   | 0.8551   | 0.5374   |
|                                      | N    | 0.6258                   | 0.1449   | 0.4626   |
|                                      | N    | 0.6258                   | 0.8551   | 0.4626   |
|                                      | N    | 0.3742                   | 0.1449   | 0.5374   |
|                                      | C    | 0.2844                   | 0.5900   | 0.5119   |
|                                      | C    | 0.7156                   | 0.4100   | 0.4881   |
|                                      | C    | 0.7156                   | 0.5900   | 0.4881   |
|                                      | C    | 0.2844                   | 0.4100   | 0.5119   |
|                                      | C    | 0.4237                   | 0.2862   | 0.5151   |
|                                      | C    | 0.5763                   | 0.7138   | 0.4849   |
|                                      | C    | 0.5763                   | 0.2862   | 0.4849   |
|                                      | C    | 0.4237                   | 0.7138   | 0.5151   |
|                                      | C    | 0.0000                   | 0.4117   | 0.5000   |
|                                      | C    | 0.0000                   | 0.5883   | 0.5000   |
|                                      | C    | 0.4409                   | 0.0000   | 0.5214   |
|                                      | C    | 0.5591                   | 0.0000   | 0.4786   |

**Table S2** A summary of the CO<sub>2</sub>/CH<sub>4</sub> separation performance of membranes in this work along with reported literature.

| Membranes                                      | Permeance (GPU)           | Selectivity           | Reference |
|------------------------------------------------|---------------------------|-----------------------|-----------|
| g-C <sub>12</sub> N <sub>8</sub>               | 1.21×10 <sup>7</sup>      | 3.03×10 <sup>3</sup>  | This work |
| MMM-0.5wt.%                                    | 154                       | 21.4                  | [1]       |
| 2D-CAP                                         | 4.824 × 10 <sup>5</sup>   | 32                    | [2]       |
| GO-PEGDA500                                    | 175.5                     | 69.5                  | [3]       |
| LDH membrane with 8 nm-thick                   | 202                       | 7                     | [4]       |
| GDY monolayer(x=10%,y=20%)                     | 1.29×10 <sup>6</sup>      | 5.27×10 <sup>3</sup>  | [5]       |
| ZSM-58 zeolite membranes(0.2MPa)               | 510                       | 290                   | [6]       |
| MMM 15%                                        | 2.74                      | 13.30                 | [7]       |
| PES CNTs                                       | 35.18                     | 4.97                  | [8]       |
| Charged NPG                                    | 5.65×10 <sup>6</sup>      | 42.8                  | [9]       |
| Strain-controlled graphenylene                 | 3.52×10 <sup>6</sup>      | 1.8 × 10 <sup>5</sup> | [10]      |
| CHA (t < 500 nm)                               | 3.82×10 <sup>4</sup>      | 198                   | [11]      |
| Amino-functionalized SAPO-34                   | 1.5×10 <sup>3</sup>       | 245                   | [12]      |
| g-C <sub>3</sub> N <sub>4</sub> -MXene-X/Pebax | about 1.2×10 <sup>3</sup> | 47.76                 | [13]      |

**Table S3** A summary of the CO<sub>2</sub>/C<sub>2</sub>H<sub>2</sub> separation performance of membranes in this work along with reported literature.

| Membranes                          | Permeance (GPU)      | Selectivity | Reference |
|------------------------------------|----------------------|-------------|-----------|
| g-C <sub>12</sub> N <sub>8</sub>   | 1.39×10 <sup>7</sup> | 310         | This work |
| Strain-controlled C <sub>2</sub> N | 5.05×10 <sup>3</sup> | 6           | [14]      |
| Strain-controlled C <sub>2</sub> O | 1.44×10 <sup>6</sup> | 6           | [14]      |
| Porous graphene                    | 585                  | 17          | [15]      |
| High-silica CHA zeolite            | 3.28×10 <sup>3</sup> | 55          | [16]      |
| ZIF-8 M-60                         | 319.1                | 1.8         | [17]      |

**Reference:**

[1] M. Tamaddodnar, A. B. Foster, M. Carta, P. Gorgojo, N. B. McKeown and P. M. Budd, *ACS*

- Appl. Mater. Interfaces*, 2020, **12**, 46756-46766.
- [2] W. S. Wang, Q. G. Hou, K. Gong, Y. G. Yan and J. Zhang, *Appl. Surf. Sci.*, 2019, **494**, 477-483.
- [3] S. F. Wang, Y. Xie, G. W. He, Q. P. J. Xin, H. Zhang, L. X. Yang, Y. F. Li, H. Wu, Y. Z. Zhang, M. D. Guiver and Z. Y. Jiang, *Angew. Chem. Int. Ed.*, 2017, **56**, 14246-14251.
- [4] Y. T. Liu, H. Wu, L. F. Min, S. Q. Song, L. X. Yang, Y. X. Ren, Y. Z. Wu, R. Zhao, H. J. Wang and Z. Y. Jiang, *Appl. Surf. Sci.*, 2020, **598**, 117663.
- [5] X. Zheng, S. Ban, B. Liu and G. J. Chen, *Chinese J. Chem. Eng.*, 2020, **28**, 1898-1903.
- [6] E. Hayakawa and S. Himeno, *Micropor. Mesopor. Mater.*, 2020, **219**, 109695.
- [7] R. Ebadi, H. Maghsoudi and A. A. Babaluo, *J. Nat. Gas Sci.*, 2021, **90**, 103947.
- [8] T. D. Kusworo, A. F. Ismail and Budiyono, *World Appl. Sci. J.*, 2014, **31**, 1512-1521.
- [9] C. Sun and B. Bai, *J. Phys. Chem. C*, 2017, **122**, 6178-6185.
- [10] L. Zhu, Y. Jin, Q. Xue, X. Li, H. Zheng, T. Wu and C. Ling, *J. Mater. Chem. A*, 2016, **4**, 15015-15021.
- [11] L. Yu, M. S. Nobandegani and J. Hedlund, *J. Membrane Sci.*, 2022, **641**, 119888.
- [12] S. R. Venna and M. A. Carreon, *Langmuir*, 2011, **27**, 2888-2894.
- [13] Y. Y. Dai, T. Fang, S. M. Li, Y. Y. Wang, S. Y. Zhong, W. J. Su and J. Li, *Sep. Purif. Technol.*, 2024, **348**, 127776.
- [14] L. Zhu, X. Chang, Y. Yin, P. Wang, X. Li and Q. Xue, *Appl. Surf. Sci.*, 2020, **530**, 147250.
- [15] S. M. Zeng, T. Wang, Y. B. Zhang, B. G. Elmegreen, B. Q. Luan and Z. L. Gu, *Langmuir*, 2023, **39**, 8638-8645.
- [16] N. D. Anjekar, K. R. Hinkle, O. Talu, Q. Fu, S. Nair and S. W. Yang, *J. Membrane Sci.*, 2023, **683**, 121853.
- [17] S. Y. Zhu, Q. J. Lin, X. P. Huang, L. J. Chen, L. Z. Liu, Z. Z. Yao and S. C. Xiang, *ACS Omega*, 2021, **6**, 33018-33023.
